# Supplementary material for: Identification of barriers and facilitators in nationwide implementation of standardized structured reporting in pathology: a mixed method study
Source: PubMed Central journal article supplement (PMC6861434; doi:10.1007/s00428-019-02609-6), 2019-07-03
Supplement: 428_2019_2609_MOESM2_ESM.pdf [file 428_2019_2609_MOESM2_ESM.pdf]

Identification of barriers and facilitators in nationwide implementation of standardized structured reporting in pathology: a mixed method study

Virchows Archiv

J.E.M. Swillens, MSc, C.E. Sluijter, MSc, L.I.H. Overbeek, PhD, Prof I.D. Nagtegaal, MD, PhD, R.P.M.G Hermens, PhD

J.E.M. Swillens

Radboud Institute for Health Sciences (RIHS), Scientific Institute for Quality of Healthcare (IQ Healthcare), Radboud University Medical Centre, Geert Grooteplein 21, POB 9101, 6500 HB, Nijmegen, The Netherlands [Julie.Swillens@radboudumc.nl](mailto:Julie.Swillens@radboudumc.nl)

**palga** Save Cancel Send Feedback Control Report number T99-TEST Patient name TestTestTest Patient number: 1234567890 Gender: O Date of birth: 07/24/1989 2.0.24 **Breast biopsy**

Macro  
Biopsy I  
Immuno  
Supplement

**Sample I**

Type of biopsy  needle biopsy (Tru-Cut)  excisional biopsy  
 VAB (vacuum-assisted biopsy)  skin biopsy  
 stereotactic biopsy  lymph node biopsy  
 incisional biopsy  other

Number of biopsies  1  2  3  4  5  6  >6

Length of biopsy (x,x cm) 2,3

Laterality  left  right  not stated

Localisation  upper lateral quadrant  centrally behind the nipple  
 upper medial quadrant  axillary tail  
 lower medial quadrant  not stated  
 lower lateral quadrant  other

Localisation O'clock  12.00  03.00  06.00  09.00  unknown  
 01.00  04.00  07.00  10.00  
 02.00  05.00  08.00  11.00

Distance to the nipple (xx,x cm) 0,3

Diameter abnormality (xx,x cm)

Clinical microcalcification present in biopsy  yes  no  yes, radiologically proven  unknown

Birads classification  1  3  4a  4c  6  unknown  other  
 2  4  4b  5

Cytological diagnosis of biopsy  yes  no  
Copy New

**General**

From population screening  yes  no  unknown

History of malignancy  no  yes  unknown

Previous therapy  none  radiotherapy  thermoablation  other  
 chemotherapy  hormonal therapy  operation  unknown

PR Conclusion Information  
In accordance with National Guideline for Breast Cancer 2.0 (2012)  
**Clinic**  
Type biopsy: needle biopsy (Tru-Cut)  
Number of biopsies: 1  
Length biopsy: 2 cm  
Laterality: left  
Localisation: upper lateral quadrant  
Distance to the nipple: 0,3 cm  
Clinical calcifications present in the biopsy: yes  
BIRADS classification: 4b

paiga Save Cancel Send Feedback Control Report number: T99-TEST Patient name: TestTestTest Patient number: 1234567890 Gender: O Date of birth: 07/24/1989 2.0.24 **Breast biopsy**

**Microscopy**

**Sample I**

**Type abnormality**

invasive tumour  non univocal benign lesion(s)  
 CIS  univocal benign lesion(s)  
 CIS with micro-invasion  other findings  
 suspected carcinoma  insufficient material

**Type invasive tumour (WHO)**

invasive carcinoma NST (previously infiltrating ductal carcinoma NOS)  invasive papillary carcinoma  NET/NEC  
 infiltrating lobular carcinoma  invasive micropapillary carcinoma  metastasis  
 tubular carcinoma  infiltrating solid papillary carcinoma  invasive tumour, further typing to follow  
 mucinous carcinoma  carcinoma with medullary features  other  
 metaplastic carcinoma

**Scoring Bloom and Richardson**

yes  not done; can be determined on request  not applicable  
 yes, less reliable on biopsy  not possible (necrosis, artefacts etc.)

**Tubular differentiation**

>75%  10-75%  <10%

**Mitotic activity**

ascertained  cannot be reliably determined  
 not yet ascertained  estimated

**Mitoses per 2mm2**

20

**Nuclear polymorphism**

1  2  3

(lymph-)angioinvasion  not encountered  present  dubious

**Microcalcification**

present  not encountered  deeper incisions are required

**PR** **Conclusion** **Information**

In accordance with National Guideline for Breast Cancer 2.0 (2012)

**Clinic**  
 Type biopsy: needle biopsy (Tru-Cut)  
 Number of biopsies: 1  
 Length biopsy: 2 cm  
 Laterality: left  
 Localisation: upper lateral quadrant  
 Distance to the nipple: 0,3 cm  
 Clinical calcifications present in the biopsy: yes  
 BIRADS classification: 4b

**Microscopy**  
 Type invasive tumour (WHO): invasive carcinoma NST (previously infiltrating ductal carcinoma NOS)  
 Grading Bloom and Richardson: I  
 Tubular differentiation: >75%  
 Mitoses per 2mm2: 20  
 Nuclear polymorphism: 1  
 Microcalcifications: present

paiga Save Cancel Send Feedback Control Report number: T99-TEST Patient name: TestTestTest Patient number: 1234567890 Gender: O Date of birth: 07/24/1989 2.0.24 **Breast biopsy**

**I** **Immunohistochemistry**

**Sample I**

**Immunohistochemistry**

fill  in progress

**Immuno Positive**

E-cadherin  CK5  CK20  S100  
 SMA  CK6  CD10  CD31  
 P63  CK 5/6  Chromogranin  Ki67 / MIB1  
 348E12  CK7  Synaptophysin  other  
 Calponin  CK14  Vimentin

**Immuno Negative**

E-cadherin  CK5  CK20  S100  
 SMA  CK6  CD10  CD31  
 P63  CK 5/6  Chromogranin  other  
 348E12  CK7  Synaptophysin  
 Calponin  CK14  Vimentin

**CK5**

mosaic pattern present  mosaic pattern not found

**CK6**

mosaic pattern present  mosaic pattern not found

**CK5/6**

mosaic pattern present  mosaic pattern not found

**Calponine**

encapsulation of suspicious glandular ducts  no encapsulation of suspicious glandular ducts

**P63**

encapsulation of suspicious glandular ducts  no encapsulation of suspicious glandular ducts

**PR** **Conclusion** **Information**

**Conclude**  
 Breast needle biopsy (Tru-Cut) left upper lateral quadrant, invasive carcinoma NST (previously infiltrating ductal carcinoma NOS), Bloom Richardson grade I.

**Diagnostic rule(s)**
